# Supplementary material
Source: PubMed Central journal article supplement (PMC5393415)
Supplement: Supp_Fig1.pdf [file Supp_Fig1.pdf]

## Supplementary Data

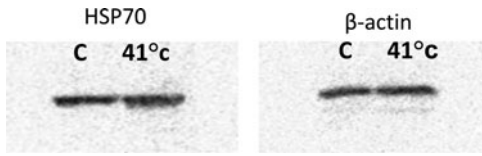

**SUPPLEMENTARY FIG. S1.** Expression of HSP70 3 h postheat shock when ASCs were exposed to 41°C for 1 h. ASC, adipose tissue-derived stromal/stem cell; HSP, heat shock protein.
