# Supplementary material
Source: PubMed Central journal article supplement (PMC5393415)
Supplement: Supp_Fig2.pdf [file Supp_Fig2.pdf]

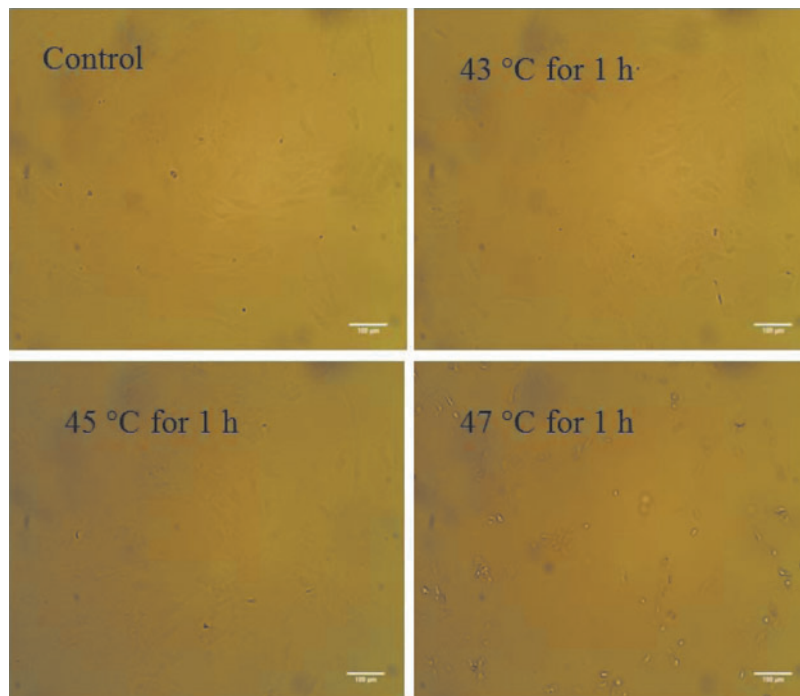

**SUPPLEMENTARY FIG. S2.** Morphology of ASCs when exposed to different temperatures. Temperatures  $>45^{\circ}\text{C}$  result in abnormal morphological changes in ASCs.
