# Supplementary material
Source: PubMed Central journal article supplement (PMC5393415)
Supplement: Supp_Fig3.pdf [file Supp_Fig3.pdf]

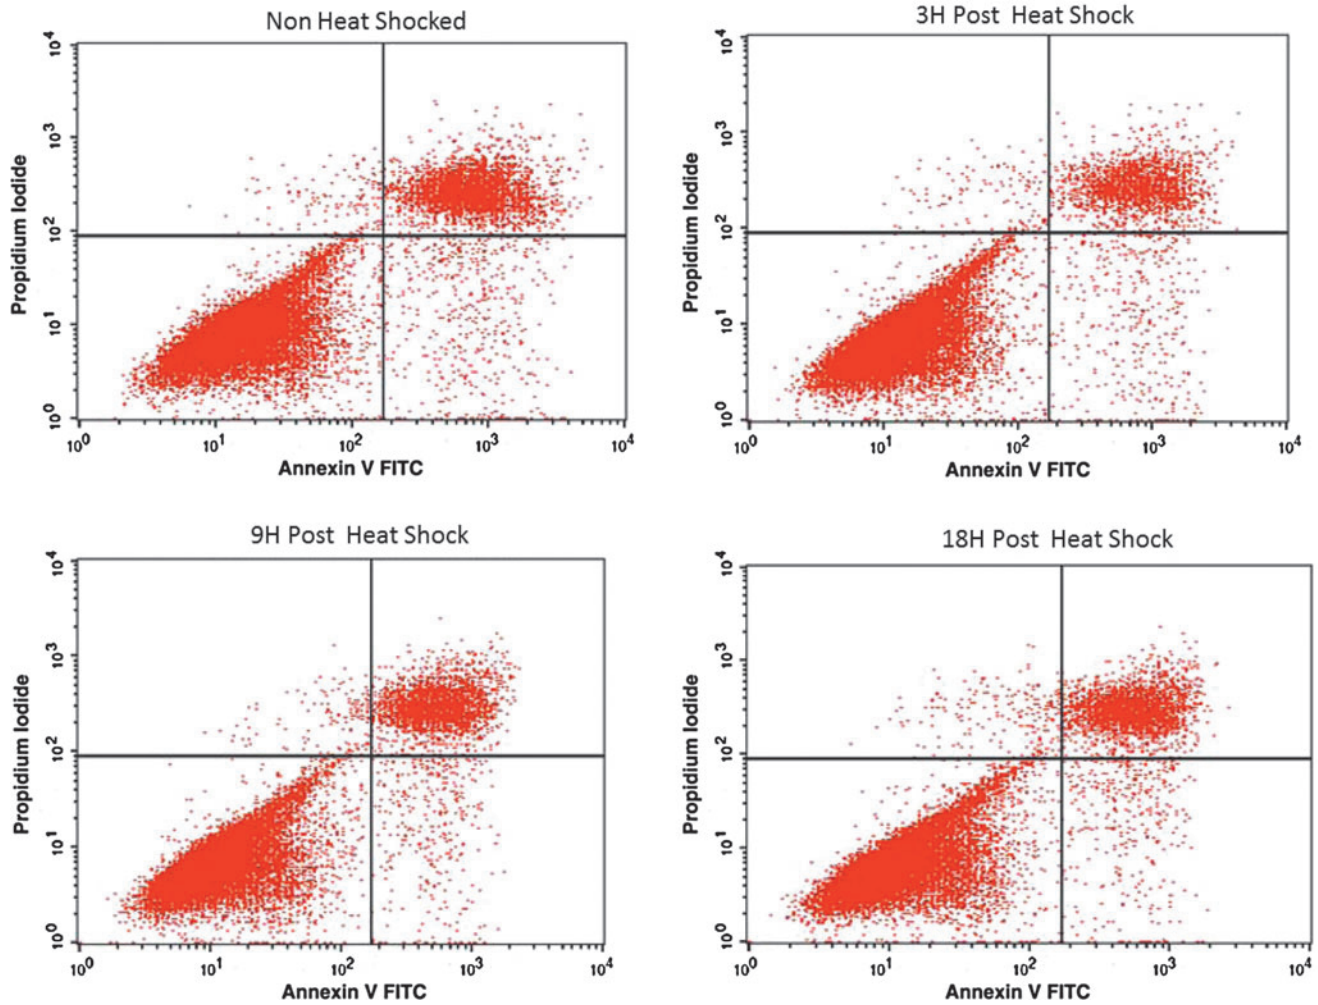

**SUPPLEMENTARY FIG. S3.** Representative flow cytometry *dot* plots of heat shocked cryopreserved ASCs in 10% PVP at various time points postheat shock. The fluorescent *dot* plots show three cell populations: live (annexin V-FITC-negative and PI-negative; annexin V<sup>-</sup> and PI<sup>-</sup>), necrotic (annexin V-FITC-positive and PI-positive; annexin V<sup>+</sup> and PI<sup>+</sup>), and apoptotic (annexin V-FITC-positive and PI-negative; annexin V<sup>+</sup> and PI<sup>-</sup>). Quadrant analysis was performed on the fluorescence *dot* plot to quantify the percentage of live, necrotic, and apoptotic cell populations. The quadrant positions were placed according to the no treatment control and 5 mM H<sub>2</sub>O<sub>2</sub> necrotic control. PVP, polyvinylpyrrolidone; FITC, fluorescein isothiocyanate; PI, propidium iodide.
