# Supplementary material
Source: PubMed Central journal article supplement (PMC5393415)
Supplement: Supp_Table1.pdf [file Supp_Table1.pdf]

SUPPLEMENTARY TABLE S1. FLOW CYTOMETRY DATA FOR CRYOPRESERVED  
ADIPOSE TISSUE-DERIVED STROMAL/STEM CELLS

| <i>CPA</i>    | <i>Sample</i>     | <i>Cryopreservation time point postheat shock</i> | <i>% Viability (±SD)</i> | <i>% Apoptosis (±SD)</i> | <i>% Necrosis (±SD)</i> |
|---------------|-------------------|---------------------------------------------------|--------------------------|--------------------------|-------------------------|
| 10% PVP       | Control ASCs      | —                                                 | 77.8±3.8                 | 3.5±2.0                  | 14.9±4.5                |
|               | Heat shocked ASCs | 3H                                                | 86.1±2.7                 | 3.1±1.5                  | 8.4±1.7                 |
|               |                   | 9H                                                | 82.5±4.7                 | 4.0±3.2                  | 11.2±2.4                |
|               |                   | 18H                                               | 81.6±6.4                 | 3.7±2.4                  | 11.9±4.9                |
| 1% DMSO       | Control ASCs      | —                                                 | 60.6±3.9                 | 7.3±3.1                  | 30.0±3.7                |
|               | Heat shocked ASCs | 3H                                                | 72.0±3.9                 | 4.9±1.3                  | 20.8±2.1                |
|               |                   | 9H                                                | 60.8±8.3                 | 6.0±2.1                  | 29.6±4.4                |
|               |                   | 18H                                               | 60.3±2.7                 | 5.2±1.8                  | 32.4±3.7                |
| 10% trehalose | Control ASCs      | —                                                 | 46.5±1.9                 | 20.0±4.8                 | 31.4±5.3                |
|               | Heat shocked ASCs | 3H                                                | 57.4±1.6                 | 13.3±3.7                 | 27.5±3.2                |
|               |                   | 9H                                                | 52.0±2.9                 | 15.2±3.7                 | 29.2±2.8                |
|               |                   | 18H                                               | 47.9±2.1                 | 17.1±2.6                 | 31.7±1.9                |

ASC, adipose tissue-derived stromal/stem cell; CPA, cryoprotectant; PVP, polyvinylpyrrolidone; DMSO, dimethyl sulfoxide; SD, standard deviation.
